# Supplementary material
Source: PubMed Central journal article supplement (PMC8077622)

**Figure S1: Stepwise approach of handling an extravasation**

Infusion/injection should be stopped; however, the needle must not be removed. One must first try to aspirate the solution from the tissue. It is also recommended to take a photo and to mark the extravasation/infiltration with a waterproof marker in order to measure and follow the extent of the event. Furthermore, the time of extravasation, estimated volume, location, and pain should be appropriately documented.

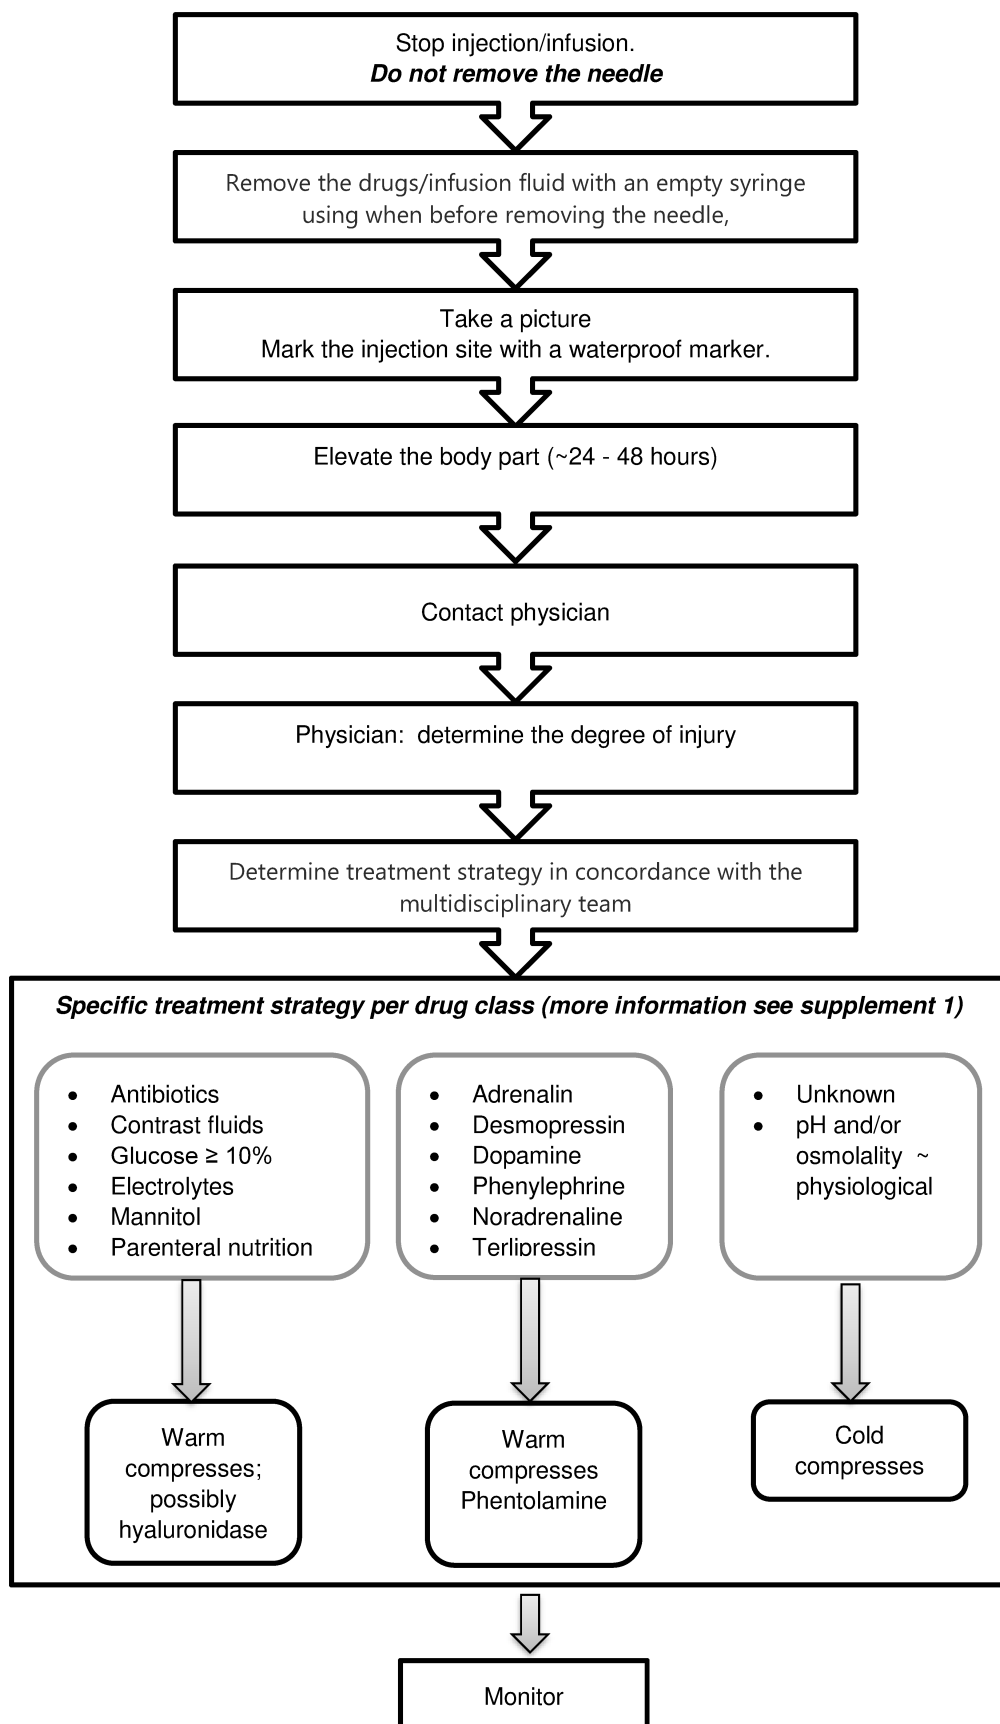

Supplement: ejhpharm-2019-002152supp001.pdf [file ejhpharm-2019-002152supp001.pdf]
