# Supplementary material
Source: PubMed Central journal article supplement (PMC8077622)
Supplement: ejhpharm-2019-002152supp002.pdf [file ejhpharm-2019-002152supp002.pdf]

**CRASHCARD EXTRAVASATION VAN NON-CYTOTOXIC AGENTS**

| CRASHCARD EXTRAVASATION VAN NON-CYTOTOXIC AGENTS                                                                                                                                                                                                                                                                                                                                                                                                                                                                                                                                                                                                                                                                                                                                                                                                                                                              |                             |                           |                                                                                                                                                                                 |                                                                                                                                                                                                              |                                                |
|---------------------------------------------------------------------------------------------------------------------------------------------------------------------------------------------------------------------------------------------------------------------------------------------------------------------------------------------------------------------------------------------------------------------------------------------------------------------------------------------------------------------------------------------------------------------------------------------------------------------------------------------------------------------------------------------------------------------------------------------------------------------------------------------------------------------------------------------------------------------------------------------------------------|-----------------------------|---------------------------|---------------------------------------------------------------------------------------------------------------------------------------------------------------------------------|--------------------------------------------------------------------------------------------------------------------------------------------------------------------------------------------------------------|------------------------------------------------|
| ESSENTIAL: An agent capable of causing blistering, tissue sloughing, or necrosis when it escapes from the intended vascular pathway into surrounding tissues.                                                                                                                                                                                                                                                                                                                                                                                                                                                                                                                                                                                                                                                                                                                                                 |                             |                           |                                                                                                                                                                                 |                                                                                                                                                                                                              |                                                |
| IRRITATION: An agent causing pain at the injection site or veins when it escapes from the intended vascular pathway without resulting long lasting inflammation or tissue damage.                                                                                                                                                                                                                                                                                                                                                                                                                                                                                                                                                                                                                                                                                                                             |                             |                           |                                                                                                                                                                                 |                                                                                                                                                                                                              |                                                |
| NON-VESICANT: An agent of which it is unlikely to cause any damage or irritation. For comfort dry or cold compresses can be used.                                                                                                                                                                                                                                                                                                                                                                                                                                                                                                                                                                                                                                                                                                                                                                             |                             |                           |                                                                                                                                                                                 |                                                                                                                                                                                                              |                                                |
| UNKNOWN: An agent of which it is unknown what kind of injury might occur when escaping the intended vascular pathway                                                                                                                                                                                                                                                                                                                                                                                                                                                                                                                                                                                                                                                                                                                                                                                          |                             |                           |                                                                                                                                                                                 |                                                                                                                                                                                                              |                                                |
| TREATMENT STRATEGIES (few are not mentioned in crashcard, but possible to consider)                                                                                                                                                                                                                                                                                                                                                                                                                                                                                                                                                                                                                                                                                                                                                                                                                           |                             |                           | ASSUMPTIONS                                                                                                                                                                     |                                                                                                                                                                                                              |                                                |
| - No special treatment is necessary<br>? Treatment strategy unknown<br>1 Dry cold compresses / cold pack: apply cold pack immediately for at least 1 hour. Following by a few times a day for at least 15 minutes.<br>2 Hyaluronidase: inject 150 IE = 1 ml Hylase® (max 1500 IE) subcutaneous around the injection site. Consult<br>3 Silver sulfadiazine 1% ointment: daily application<br>4 Dry warm compresses / warm packs: apply heat so it is comfortable for the patient. 4 times daily for 20 minutes.<br>5 Phentolamine: inject 5-10 mg in NaCl 0.9% 10-15 ml within 12 hours. Consult plastic surgeon.<br>6 Extravasation/flush protocol in severe cases. Consult plastic surgeon.<br>7 Lidocaine of mepivacaine 1-2%: 5-10 ml administration<br>8 Heparin 500 USP administration, no standard treatment. Only when anticoagulation effect is indicated.<br>9 Nitroglycerin 2% topical application |                             |                           | PHYSIOLOGICAL PH: 5.0-9.0<br>LOW PH: ≤ 8.0<br>HIGH PH: ≥ 9.0<br><br>PHYSIOLOGICAL OSMOLARITY: 200 - 900 mOsm/L<br>HIGH OSMOLARITY: ≥ 900 mOsm/L<br>LOW OSMOLARITY: ≤ 200 mOsm/L |                                                                                                                                                                                                              |                                                |
| Drug                                                                                                                                                                                                                                                                                                                                                                                                                                                                                                                                                                                                                                                                                                                                                                                                                                                                                                          | Osmolality                  | pH                        | Pharmacological properties                                                                                                                                                      | Extravasation (ref)                                                                                                                                                                                          | Treatment strategy, in order of use            |
| Aciclovir                                                                                                                                                                                                                                                                                                                                                                                                                                                                                                                                                                                                                                                                                                                                                                                                                                                                                                     |                             | high                      |                                                                                                                                                                                 | Severe tissue damage and necrosis (high pH (11) and osmolality -physiological) * (7)                                                                                                                         | 4 + 2 + 6                                      |
| Alfacalcidol                                                                                                                                                                                                                                                                                                                                                                                                                                                                                                                                                                                                                                                                                                                                                                                                                                                                                                  | high                        | low                       |                                                                                                                                                                                 | Irritation and pain (pH -physiological (7.5) and high osmolality (8000 mOsm/kg) ) * (13)                                                                                                                     | 4 + 2 + 6                                      |
| Amiodarone                                                                                                                                                                                                                                                                                                                                                                                                                                                                                                                                                                                                                                                                                                                                                                                                                                                                                                    |                             | low                       |                                                                                                                                                                                 | Severe tissue damage and necrosis (low pH (-4) and osmolality -physiological) (1)(7)                                                                                                                         | 4 + 2 + 6                                      |
| Aranidine                                                                                                                                                                                                                                                                                                                                                                                                                                                                                                                                                                                                                                                                                                                                                                                                                                                                                                     | high                        | low                       |                                                                                                                                                                                 | Severe tissue damage and irritation are possible (pH - 5.6 and high osmolality (950 mOsm/kg)) (1)(2)(7)                                                                                                      | 4 + 2 + 6                                      |
| Atracurium                                                                                                                                                                                                                                                                                                                                                                                                                                                                                                                                                                                                                                                                                                                                                                                                                                                                                                    | high                        | high                      |                                                                                                                                                                                 | Irritation (low pH (3.25 to 3.65) ) (1)                                                                                                                                                                      | 4 + 2 + 6                                      |
| Calcium chloride 10%                                                                                                                                                                                                                                                                                                                                                                                                                                                                                                                                                                                                                                                                                                                                                                                                                                                                                          | high                        | high                      |                                                                                                                                                                                 | Necrosis, irritation and skin ablation (osmolality 1765 mOsm/kg, pH - physiological) (5)(7)(8)(17)                                                                                                           | 4 + 2 + 6                                      |
| Calcium gluconaat 10%                                                                                                                                                                                                                                                                                                                                                                                                                                                                                                                                                                                                                                                                                                                                                                                                                                                                                         | high                        | high                      |                                                                                                                                                                                 | pH physiological, osmolality 660 mOsm/kg (5)                                                                                                                                                                 | 4 + 2 + 6                                      |
| Co-trimoxazole                                                                                                                                                                                                                                                                                                                                                                                                                                                                                                                                                                                                                                                                                                                                                                                                                                                                                                |                             | high                      |                                                                                                                                                                                 | Damage to tissue, irritation and pain (high pH (9.0-10.5) ) (1)(11)(13)                                                                                                                                      | 4 + 2 + 6                                      |
| Dantrolene                                                                                                                                                                                                                                                                                                                                                                                                                                                                                                                                                                                                                                                                                                                                                                                                                                                                                                    |                             | high                      |                                                                                                                                                                                 | Necrosis (high pH (8.5-11) and osmolality -physiological) (1)(10)(17)                                                                                                                                        | 4 + 2 + 6                                      |
| Dosmopressin                                                                                                                                                                                                                                                                                                                                                                                                                                                                                                                                                                                                                                                                                                                                                                                                                                                                                                  |                             | low                       | vasoconstrictor activity                                                                                                                                                        | Severe tissue damage and pain (vasoconstrictor, low pH (4) and osmolality -physiological) (1)(8)(10)                                                                                                         | 4 + 2 + 6                                      |
| Dioxin                                                                                                                                                                                                                                                                                                                                                                                                                                                                                                                                                                                                                                                                                                                                                                                                                                                                                                        | high                        | high                      |                                                                                                                                                                                 | Severe tissue damage and necrosis (pH -physiological, osmolality high) (1)(5)(11)                                                                                                                            | 4 + 2 + 6                                      |
| Dobutamine                                                                                                                                                                                                                                                                                                                                                                                                                                                                                                                                                                                                                                                                                                                                                                                                                                                                                                    |                             | low                       | vasoconstrictor activity                                                                                                                                                        | Severe tissue damage and necrosis (vasoconstrictor, low pH (2.5-5.5) and osmolality -physiological) (1)(5)(7)(14)                                                                                            | 4 + 2 + 6                                      |
| Dopamine                                                                                                                                                                                                                                                                                                                                                                                                                                                                                                                                                                                                                                                                                                                                                                                                                                                                                                      | high                        | low                       | vasoconstrictor activity                                                                                                                                                        | Severe tissue damage and necrosis (vasoconstrictor, low pH (2.5-5.0) and osmolality 560mOsm/kg (1)(5)(7)(14)                                                                                                 | 4 + 2 + 6                                      |
| Epinephrine (with or without tetracaine)                                                                                                                                                                                                                                                                                                                                                                                                                                                                                                                                                                                                                                                                                                                                                                                                                                                                      |                             | low                       | vasoconstrictor activity                                                                                                                                                        | Severe tissue damage and necrosis (vasoconstrictor, low pH (2.5-5.0) and osmolality -physiological) (348 mOsm/kg) ) (1)(7)(8)                                                                                | 4 + 2 + 6                                      |
| Epoestrolenol                                                                                                                                                                                                                                                                                                                                                                                                                                                                                                                                                                                                                                                                                                                                                                                                                                                                                                 | high                        | high                      |                                                                                                                                                                                 | Damage to tissue (high pH (11-12) and osmolality - physiological (150 - 350 mOsm/kg)) *                                                                                                                      | 4 + 2 + 6                                      |
| Esmolol                                                                                                                                                                                                                                                                                                                                                                                                                                                                                                                                                                                                                                                                                                                                                                                                                                                                                                       |                             | low                       |                                                                                                                                                                                 | Damage to tissue, necrosis and blistering are possible (low pH (4.5-5.5) and osmolality (300 mOsm/L)) *                                                                                                      | 1 + 6                                          |
| Fluorescein                                                                                                                                                                                                                                                                                                                                                                                                                                                                                                                                                                                                                                                                                                                                                                                                                                                                                                   |                             | high                      |                                                                                                                                                                                 | Severe tissue damage, necrosis, and pain. pH 8-10 (1)(5) (17)                                                                                                                                                | 4 + 2 + 6                                      |
| Glucose ≥10%                                                                                                                                                                                                                                                                                                                                                                                                                                                                                                                                                                                                                                                                                                                                                                                                                                                                                                  |                             | high                      |                                                                                                                                                                                 | Damage to tissues, irritation and pain (pH range: 3.5-6.5 and high osmolality 10-50% (504-2520 mOsm/L)) (8)(10)(11)                                                                                          | 4 + 2 + 6                                      |
| Nitroglycerin                                                                                                                                                                                                                                                                                                                                                                                                                                                                                                                                                                                                                                                                                                                                                                                                                                                                                                 |                             | low                       |                                                                                                                                                                                 | Severe damage to tissues (pH range: 3.0-6.5 and osmolality -physiological) (1)(6)(11)                                                                                                                        | 4 + 2 + 6                                      |
| Hemalin                                                                                                                                                                                                                                                                                                                                                                                                                                                                                                                                                                                                                                                                                                                                                                                                                                                                                                       | high                        | high                      | additives: ethanol/ propylenealcol                                                                                                                                              | Tissue damage, necrosis, and pain ( pH 8.5-9.5) (17)                                                                                                                                                         | 4 + 2 + 6                                      |
| Magnesium sulfate (and - Nitro)                                                                                                                                                                                                                                                                                                                                                                                                                                                                                                                                                                                                                                                                                                                                                                                                                                                                               | high                        | high                      |                                                                                                                                                                                 | Damage to tissues (physiological pH (5.5-7.0) and high osmolality Magnesium sulphate - 10g/50ml = Necrosis and pain (pH range: 4.5-7.0 and varying osmolality (1)(2)(7) - mannitol Baxter 10% 550mOsm/L, 15% | 4 + 2 + 6                                      |
| Norepinephrine                                                                                                                                                                                                                                                                                                                                                                                                                                                                                                                                                                                                                                                                                                                                                                                                                                                                                                |                             | low                       | vasoconstrictor activity                                                                                                                                                        | Ischemia and necrosis (vasoconstrictor, low pH (3.4 to 4.4) and osmolality -physiological) (1)(5)(8)                                                                                                         | 4 + 2 + 6                                      |
| Phenobarbital                                                                                                                                                                                                                                                                                                                                                                                                                                                                                                                                                                                                                                                                                                                                                                                                                                                                                                 |                             | high                      | additive propylene glycol                                                                                                                                                       | Severe tissue damage and necrosis (high pH (8.5-10.5) and osmolality physiological) (1)(2)(7)                                                                                                                | 4 + 2 + 6                                      |
| Phenylephrine                                                                                                                                                                                                                                                                                                                                                                                                                                                                                                                                                                                                                                                                                                                                                                                                                                                                                                 |                             | low                       | vasoconstrictor activity                                                                                                                                                        | Severe tissue damage, necrosis and moulting ( pH range: 3.0-6.5 low, osmolality physiological) (1)(5)(11)                                                                                                    | 4 + 2 + 6                                      |
| Phenytoin                                                                                                                                                                                                                                                                                                                                                                                                                                                                                                                                                                                                                                                                                                                                                                                                                                                                                                     |                             | high                      |                                                                                                                                                                                 | Necrosis, irritation and inflammation (high pH (10-12) and osmolality -physiological) (1)(7)(8)                                                                                                              | 4 + 2 + 6                                      |
| Polidocanol                                                                                                                                                                                                                                                                                                                                                                                                                                                                                                                                                                                                                                                                                                                                                                                                                                                                                                   |                             | high                      |                                                                                                                                                                                 | Pain and necrosis                                                                                                                                                                                            | paravasale: 2 + 6 *<br>intra-arterial: 7 + 8 * |
| Potassium chloride                                                                                                                                                                                                                                                                                                                                                                                                                                                                                                                                                                                                                                                                                                                                                                                                                                                                                            | high                        | high                      |                                                                                                                                                                                 | Pain, irritation and damage to tissues is possible due to high osmotic property (pH range: 4.0-8.0 and high osmolality * 7.5% 1750 mOsm/kg, 10% 2415 mOsm/kg) (1)(2)(7)(8)                                   | 4 + 2 + 6                                      |
| Promethazine                                                                                                                                                                                                                                                                                                                                                                                                                                                                                                                                                                                                                                                                                                                                                                                                                                                                                                  |                             | low                       |                                                                                                                                                                                 | Severe tissue damage, pain, necrosis and gangrene to extremities (low pH (2.5-3.5) and osmolality -physiological) (1)(5)(7)(14)                                                                              | 4 + 2 + 6                                      |
| Sodium bicarbonate                                                                                                                                                                                                                                                                                                                                                                                                                                                                                                                                                                                                                                                                                                                                                                                                                                                                                            | >4.2% high                  |                           |                                                                                                                                                                                 | Pain and moulting (pH -physiological and varying osmolality) (1)(2)(7)(8)                                                                                                                                    | 4 + 2 + 6                                      |
| Sodium chloride ≥3%                                                                                                                                                                                                                                                                                                                                                                                                                                                                                                                                                                                                                                                                                                                                                                                                                                                                                           | high                        |                           |                                                                                                                                                                                 | (1.4%):33.5 mOsm/L,(4.2%): 1000 mOsm/L, (8.4%): 2000 mOsm/L (17)<br>Ischemia and necrosis (pH range: 4.0-7.0 and high osmolality (3% 939 mOsm/kg, 10% 3422 mOsm/l)) (2)(7)(14)                               | 4 + 2 + 6                                      |
| Terlipressin                                                                                                                                                                                                                                                                                                                                                                                                                                                                                                                                                                                                                                                                                                                                                                                                                                                                                                  |                             |                           | vasopressor activity                                                                                                                                                            | Necrosis (vasoconstrictor, low pH and osmolality -physiological) (2)(5)(7)(8)                                                                                                                                | 4 + 5 + 6 + 9                                  |
| Thiopental                                                                                                                                                                                                                                                                                                                                                                                                                                                                                                                                                                                                                                                                                                                                                                                                                                                                                                    |                             | high                      | cytotoxicity                                                                                                                                                                    | Necrosis (high pH 10-11) (1)(7) (17)                                                                                                                                                                         | 4 + 2 + 6/8                                    |
| Doxycycline                                                                                                                                                                                                                                                                                                                                                                                                                                                                                                                                                                                                                                                                                                                                                                                                                                                                                                   |                             | low (US),<br>phys (EU/NL) |                                                                                                                                                                                 | Severe tissue damage (US product: low pH 1.8-3.3; Dutch product: pH >6) (1)                                                                                                                                  | 4 + 2 + 6; Lower pH more conservative          |
| Ethanol 100%                                                                                                                                                                                                                                                                                                                                                                                                                                                                                                                                                                                                                                                                                                                                                                                                                                                                                                  |                             |                           |                                                                                                                                                                                 | Necrosis (15)                                                                                                                                                                                                | 1 + 6                                          |
| Etomidate                                                                                                                                                                                                                                                                                                                                                                                                                                                                                                                                                                                                                                                                                                                                                                                                                                                                                                     |                             |                           |                                                                                                                                                                                 | Necrosis and pain (pH -physiological, osmolality 400mOsm/kg) *(1)                                                                                                                                            | 1 + 6                                          |
| Iron (monofer/cosmofor)                                                                                                                                                                                                                                                                                                                                                                                                                                                                                                                                                                                                                                                                                                                                                                                                                                                                                       |                             |                           |                                                                                                                                                                                 | Necrosis, inflammation, pain and brown discoloration of the skin ( pH 5-7 and high physiological osmolality)                                                                                                 | 1 + 6                                          |
| Metronidazole                                                                                                                                                                                                                                                                                                                                                                                                                                                                                                                                                                                                                                                                                                                                                                                                                                                                                                 |                             |                           |                                                                                                                                                                                 | Gangrene and necrosis to extremities (pH range: 4.5-7.0 and osmolality -physiological) (1)(6)(11)                                                                                                            | 1 + 6                                          |
| Propofol                                                                                                                                                                                                                                                                                                                                                                                                                                                                                                                                                                                                                                                                                                                                                                                                                                                                                                      |                             |                           |                                                                                                                                                                                 | Pain, swelling and necrosis *(1)                                                                                                                                                                             | 1 + 6                                          |
| Vancomycin                                                                                                                                                                                                                                                                                                                                                                                                                                                                                                                                                                                                                                                                                                                                                                                                                                                                                                    |                             | low                       |                                                                                                                                                                                 | Necrosis, irritation and pain (low pH (3.5) and osmolality -fysoloisch) (1)(2)(7)(8)                                                                                                                         | 4 + 2 + 6                                      |
| Acetazolamide                                                                                                                                                                                                                                                                                                                                                                                                                                                                                                                                                                                                                                                                                                                                                                                                                                                                                                 |                             | high                      |                                                                                                                                                                                 | Irritation, damage to tissues and ulceration are possible (high pH (9.6) and high osmolality (548 mOsm/kg)) (2)(3)(4)                                                                                        | 4 + 2 + 6                                      |
| Amikacin                                                                                                                                                                                                                                                                                                                                                                                                                                                                                                                                                                                                                                                                                                                                                                                                                                                                                                      |                             | low                       |                                                                                                                                                                                 | Tissue damage (low pH (4.5) and osmolality -physiological (317 mOsm/kg)) (2)                                                                                                                                 | 4 + 2 + 6                                      |
| Amoxicillin (clavulanic acid)                                                                                                                                                                                                                                                                                                                                                                                                                                                                                                                                                                                                                                                                                                                                                                                                                                                                                 |                             | high                      |                                                                                                                                                                                 | Necrosis is possible (high pH (8-10)) (6)(9)                                                                                                                                                                 | 4 + 2 + 6                                      |
| Amphotericin B                                                                                                                                                                                                                                                                                                                                                                                                                                                                                                                                                                                                                                                                                                                                                                                                                                                                                                |                             | low                       |                                                                                                                                                                                 | Irritation and damage to tissue are possible (pH and osmolality -physiological) (1)(2)                                                                                                                       | 4 + 2 + 6                                      |
| Atropine                                                                                                                                                                                                                                                                                                                                                                                                                                                                                                                                                                                                                                                                                                                                                                                                                                                                                                      |                             | low                       |                                                                                                                                                                                 | Damage to tissues (low pH (3.0-4.0) and osmolality-physiological) *(4)(6)                                                                                                                                    | 4 + 2 + 6                                      |
| Benzylpenicillin                                                                                                                                                                                                                                                                                                                                                                                                                                                                                                                                                                                                                                                                                                                                                                                                                                                                                              |                             | low                       |                                                                                                                                                                                 | Irritation and pain are possible (pH and osmolality -physiological) *(4)(6)                                                                                                                                  | 1 + 3 + 6                                      |
| Caffeine citrate                                                                                                                                                                                                                                                                                                                                                                                                                                                                                                                                                                                                                                                                                                                                                                                                                                                                                              |                             | low                       |                                                                                                                                                                                 | Skin necrosis (low pH (4.7)) *                                                                                                                                                                               | 4 + 2 + 6                                      |
| Casopfungin                                                                                                                                                                                                                                                                                                                                                                                                                                                                                                                                                                                                                                                                                                                                                                                                                                                                                                   |                             |                           |                                                                                                                                                                                 | Damage to tissue and pain are possible (pH and osmolality physiological) (1)(11)                                                                                                                             | 1 + 6                                          |
| Cefotaxime                                                                                                                                                                                                                                                                                                                                                                                                                                                                                                                                                                                                                                                                                                                                                                                                                                                                                                    |                             |                           |                                                                                                                                                                                 | Damage to tissue and pain are possible (physiological pH (5.2), osmolality dependent on concentration 145mOsm/L in WFI 525mOsm/kg) (2)(17)                                                                   | 4 + 2 + 6                                      |
| Ciprofloxacin                                                                                                                                                                                                                                                                                                                                                                                                                                                                                                                                                                                                                                                                                                                                                                                                                                                                                                 |                             | low                       |                                                                                                                                                                                 | Tissue damage is possible (low pH (4.2) and osmolality -physiological) (2)                                                                                                                                   | 4 + 2 + 6                                      |
| Clindamycin                                                                                                                                                                                                                                                                                                                                                                                                                                                                                                                                                                                                                                                                                                                                                                                                                                                                                                   |                             |                           | additives: Sodiumhydroxide, benzylalcohol                                                                                                                                       | Irritation and pain (pH and osmolality -physiological) (2)                                                                                                                                                   | 1 + 6                                          |
| Clonazepam                                                                                                                                                                                                                                                                                                                                                                                                                                                                                                                                                                                                                                                                                                                                                                                                                                                                                                    |                             | low                       | additives: Ethanol(96%)                                                                                                                                                         | Damage to tissue (low pH (3.4-4.3) ) (1)(11)(13)                                                                                                                                                             | 4 + 2 + 6                                      |
| Diazepam                                                                                                                                                                                                                                                                                                                                                                                                                                                                                                                                                                                                                                                                                                                                                                                                                                                                                                      |                             | high                      |                                                                                                                                                                                 | Irritation and blistering are possible (pH and osmolality - physiological (Kennisbank) (pH (6.6) and high osmolality)                                                                                        | 4 + 2 + 6                                      |
| Doxapram                                                                                                                                                                                                                                                                                                                                                                                                                                                                                                                                                                                                                                                                                                                                                                                                                                                                                                      |                             | low                       |                                                                                                                                                                                 | Irritation (low pH 3.5-5, osmolality physiological) (1)                                                                                                                                                      | 4 + 2 + 6                                      |
| Enoximone                                                                                                                                                                                                                                                                                                                                                                                                                                                                                                                                                                                                                                                                                                                                                                                                                                                                                                     |                             | high                      | additives: ethanol (9.8% g/v), propylene glycol (41% g/v), sodiumhydroxide                                                                                                      | Damage to tissue (high pH (-12) ) (1)                                                                                                                                                                        | 4 + 2 + 6                                      |
| Erythromycin                                                                                                                                                                                                                                                                                                                                                                                                                                                                                                                                                                                                                                                                                                                                                                                                                                                                                                  |                             |                           | chemical irritation                                                                                                                                                             | Damage to tissues is possible (pH and osmolality -physiological) (1)(2)                                                                                                                                      | 1 + 6                                          |
| Foscarnet                                                                                                                                                                                                                                                                                                                                                                                                                                                                                                                                                                                                                                                                                                                                                                                                                                                                                                     |                             |                           |                                                                                                                                                                                 | Tissue damage is possible (pH -physiological) (6)(11)                                                                                                                                                        | 1 + 6                                          |
| Ganciclovir                                                                                                                                                                                                                                                                                                                                                                                                                                                                                                                                                                                                                                                                                                                                                                                                                                                                                                   |                             | high                      |                                                                                                                                                                                 | Irritation (high pH (-11) and osmolality -physiological) *(2)                                                                                                                                                | 4 + 2 + 6                                      |
| Gentamicin                                                                                                                                                                                                                                                                                                                                                                                                                                                                                                                                                                                                                                                                                                                                                                                                                                                                                                    |                             | low                       |                                                                                                                                                                                 | Irritation and blistering are possible (low pH (3.0-5.0) and osmolality -physiological) *(1)(2)                                                                                                              | 4 + 2 + 6                                      |
| Heparin                                                                                                                                                                                                                                                                                                                                                                                                                                                                                                                                                                                                                                                                                                                                                                                                                                                                                                       |                             |                           |                                                                                                                                                                                 | Irritation and necrosis are possible (pH and osmolality -physiological) (2)(11)                                                                                                                              | 1 + 6                                          |
| Iloprost                                                                                                                                                                                                                                                                                                                                                                                                                                                                                                                                                                                                                                                                                                                                                                                                                                                                                                      |                             |                           | additives: ethanol, tromethamine                                                                                                                                                | Damage to tissues an damage to nerves are possible caused by ethanol and tromethamine (pH range: 7.8-8.8) *(6)(11)                                                                                           | 1 + 6                                          |
| Indometacin                                                                                                                                                                                                                                                                                                                                                                                                                                                                                                                                                                                                                                                                                                                                                                                                                                                                                                   |                             |                           |                                                                                                                                                                                 | Damage to tissues is possible (pH -physiological) (1)(6)                                                                                                                                                     | 1 + 6                                          |
| Isoprenaline                                                                                                                                                                                                                                                                                                                                                                                                                                                                                                                                                                                                                                                                                                                                                                                                                                                                                                  | low                         | low                       |                                                                                                                                                                                 | Damage to tissues is possible (low pH (3.5-4.2-5.4) and low osmolality) (6)                                                                                                                                  | 4 + 2 + 6                                      |
| Itraconazole                                                                                                                                                                                                                                                                                                                                                                                                                                                                                                                                                                                                                                                                                                                                                                                                                                                                                                  |                             | low                       |                                                                                                                                                                                 | Damage to tissues is possible (low pH (4.5)) (6)(11)                                                                                                                                                         | 4 + 2 + 6                                      |
| Labetalol                                                                                                                                                                                                                                                                                                                                                                                                                                                                                                                                                                                                                                                                                                                                                                                                                                                                                                     |                             | low                       |                                                                                                                                                                                 | Damage to tissues is possible (low pH (3.0-4.5), osmolality - physiological) (11) (17)                                                                                                                       | 4 + 2 + 6                                      |
| Lidocaine                                                                                                                                                                                                                                                                                                                                                                                                                                                                                                                                                                                                                                                                                                                                                                                                                                                                                                     |                             | low                       |                                                                                                                                                                                 | Damage to tissues is possible (low pH (4.0-5.5) and osmolality - 2% solution is physiological (270-320 mOsm/kg), 10% solution 701 mOsm/kg) *(6)(11)(17)                                                      | 4 + 2 + 6                                      |
| Lorazepam                                                                                                                                                                                                                                                                                                                                                                                                                                                                                                                                                                                                                                                                                                                                                                                                                                                                                                     | high                        |                           | additives: benzylalcohol, propylene glycol                                                                                                                                      | Gangrene is possible after intra-arterial injection (pH -physiological and high osmolality) *(1)(2)                                                                                                          | 1 + 6                                          |
| Methythionine                                                                                                                                                                                                                                                                                                                                                                                                                                                                                                                                                                                                                                                                                                                                                                                                                                                                                                 | low (before reconstitution) | low                       |                                                                                                                                                                                 | Damage to tissues and necrosis are possible (vasoconstrictor, low pH (3-4.5) and low osmolality ) (5)(6)                                                                                                     | 4 + 2/9 + 6                                    |
| Midazolam                                                                                                                                                                                                                                                                                                                                                                                                                                                                                                                                                                                                                                                                                                                                                                                                                                                                                                     | low                         | low                       |                                                                                                                                                                                 | Damage to tissue and pain are possible (physiological pH (approximately 5-9) low pH (3-4) and osmolality -physiological, 5mg/ml, hypo-osmotic) (1)(2)(6)                                                     | 4 + 2 + 6                                      |
| Morphine                                                                                                                                                                                                                                                                                                                                                                                                                                                                                                                                                                                                                                                                                                                                                                                                                                                                                                      |                             | low                       |                                                                                                                                                                                 | Damage to tissues and necrosis is possible (low pH (2.5-6.5) and osmolality -physiological) (1)(11)(13)                                                                                                      | 4 + 2 + 6                                      |
| Mycophenolic acid                                                                                                                                                                                                                                                                                                                                                                                                                                                                                                                                                                                                                                                                                                                                                                                                                                                                                             |                             | low                       | additive polysorbate                                                                                                                                                            | Irritation (low pH (2.4-4.1), osmolality physiological) (4)(6)(11)                                                                                                                                           | 4 + 2 + 6                                      |
| Naloxon                                                                                                                                                                                                                                                                                                                                                                                                                                                                                                                                                                                                                                                                                                                                                                                                                                                                                                       |                             | low                       |                                                                                                                                                                                 | Damage to tissues and necrosis are possible (low pH (3 to 6.5) ) (1)(11)(13)                                                                                                                                 | 4 + 2 + 6                                      |
| Nimodipine                                                                                                                                                                                                                                                                                                                                                                                                                                                                                                                                                                                                                                                                                                                                                                                                                                                                                                    | high                        | high                      |                                                                                                                                                                                 | Damage to tissues is possible (pH -physiological (6.6) and high osmolality (740 mOsm/kg)) *(6)                                                                                                               | 4 + 2 + 6                                      |
| Octreotide                                                                                                                                                                                                                                                                                                                                                                                                                                                                                                                                                                                                                                                                                                                                                                                                                                                                                                    |                             | low                       |                                                                                                                                                                                 | Damage to tissues is possible (low pH (3.9 to 4.5) ) (1)(6)                                                                                                                                                  | 4 + 2 + 6                                      |
| Ondansetron                                                                                                                                                                                                                                                                                                                                                                                                                                                                                                                                                                                                                                                                                                                                                                                                                                                                                                   |                             | low                       |                                                                                                                                                                                 | Damage to tissues is possible (low pH (3.3-4) and osmolality -physiological) (2)(11)(13)                                                                                                                     | 4 + 2 + 6                                      |
| Pantoprazole                                                                                                                                                                                                                                                                                                                                                                                                                                                                                                                                                                                                                                                                                                                                                                                                                                                                                                  |                             | high                      |                                                                                                                                                                                 | Damage to tissues is possible (high pH (9-10.5) and osmolality -physiological) (1)(6)                                                                                                                        | 4 + 2 + 6                                      |
| Paraverine                                                                                                                                                                                                                                                                                                                                                                                                                                                                                                                                                                                                                                                                                                                                                                                                                                                                                                    |                             | low                       |                                                                                                                                                                                 | Damage to tissues is possible (low pH (3-4) (16)                                                                                                                                                             | 4 + 2 + 6                                      |
| Pentamidine                                                                                                                                                                                                                                                                                                                                                                                                                                                                                                                                                                                                                                                                                                                                                                                                                                                                                                   |                             | low                       |                                                                                                                                                                                 | Ulceration and necrosis are possible (low pH (4.09-5.4) and osmolality range: 160-455 mOsm/L) (1)(7)                                                                                                         | 4 + 2 + 6                                      |
| Pethidine                                                                                                                                                                                                                                                                                                                                                                                                                                                                                                                                                                                                                                                                                                                                                                                                                                                                                                     |                             | low                       |                                                                                                                                                                                 | Irritation is possible (low pH (3.5-6)) *(1)                                                                                                                                                                 | 4 + 2 + 6                                      |
| Phosphate (sodium potassium)                                                                                                                                                                                                                                                                                                                                                                                                                                                                                                                                                                                                                                                                                                                                                                                                                                                                                  | high                        | high                      |                                                                                                                                                                                 | Unknown (pH -physiological (6.2-6.8) and high osmolality) (1)(11)                                                                                                                                            | 4 + 2 + 6                                      |
| Piperacilline/tazobactam                                                                                                                                                                                                                                                                                                                                                                                                                                                                                                                                                                                                                                                                                                                                                                                                                                                                                      |                             |                           |                                                                                                                                                                                 | Damage to tissues is possible (pH and osmolality -physiological) (1)(2)(6)(11)                                                                                                                               | 1 + 6                                          |
| Quinine                                                                                                                                                                                                                                                                                                                                                                                                                                                                                                                                                                                                                                                                                                                                                                                                                                                                                                       | high                        | low                       |                                                                                                                                                                                 | Damage to tissues is possible (low pH (2.0-3.0) osmolality 553mOsm/kg) (6)(11)(17)                                                                                                                           | 4 + 2 + 6                                      |
| Rifampicin                                                                                                                                                                                                                                                                                                                                                                                                                                                                                                                                                                                                                                                                                                                                                                                                                                                                                                    |                             | high                      |                                                                                                                                                                                 | Irritation and inflammation (high/physiological pH (8-8.8)) *(6)(11)                                                                                                                                         | 4 + 2 + 6                                      |
| Salbutamol                                                                                                                                                                                                                                                                                                                                                                                                                                                                                                                                                                                                                                                                                                                                                                                                                                                                                                    |                             | low                       |                                                                                                                                                                                 | Damage to tissues is possible (low pH (3.5) (11)(13)                                                                                                                                                         | 4 + 2 + 6                                      |

|                                              |      |     |                        |                                                                                                                             |           |
|----------------------------------------------|------|-----|------------------------|-----------------------------------------------------------------------------------------------------------------------------|-----------|
| Sodium thiosulfate                           | high |     |                        | Damage to tissues is possible (pH ~ physiological range: 7.0-9.0, osmolality >2000mOsm/kg) (1)(6)(11)(17)                   | 4 + 2 + 6 |
| Tetracosactide                               |      | low |                        | Irritation is possible (low pH (3.8-4.5) *(1)(6)(11)(13)                                                                    | 4 + 2 + 6 |
| Valproic acid                                | high |     |                        | pH 7-8.5, osmolality 1230-1371 mOsm/kg (17)                                                                                 | 1 + 6     |
| Alteplase                                    |      |     | proteolytic properties | Bleeding and/or inflammation are possible. Be aware of proteolytic properties, pH (7.3) and osmolality ~physiological (6)** | 1 + 6     |
| Abatacept                                    |      |     |                        | Unknown (pH ~physiological) *                                                                                               | -         |
| Abciximab                                    |      |     |                        | Unknown (pH ~physiological) (1)                                                                                             | -         |
| Alemtuzumab                                  |      |     |                        | Unknown (pH ~physiological) (7.0-7.4) *                                                                                     | -         |
| Anti-hepatitis B immunoglobulin              |      |     |                        | Unknown (pH ~physiological) (1)                                                                                             | -         |
| Anti-rhesus (D) immunoglobulin               |      |     |                        | Unknown (osmolality ~physiological) *                                                                                       | -         |
| Anti-tetanus immunoglobulin                  |      |     |                        | Unknown (pH ~physiological) (1)                                                                                             | -         |
| Anti-trombin                                 |      |     |                        | Unknown (pH ~physiological) (1)                                                                                             | -         |
| Anti-varicella zoster immunoglobulin         |      |     |                        | Unknown (pH ~physiological) (1)                                                                                             | -         |
| Artesunate                                   |      |     |                        | Unknown (pH and osmolality ~physiological) (6)                                                                              | -         |
| BMR-vaccin                                   |      |     |                        | Unknown                                                                                                                     | -         |
| Bumetanide                                   |      |     |                        | Unknown (pH and osmolality ~physiological) (1)                                                                              | -         |
| Butylscopolamine                             |      |     |                        | Unknown (osmolality ~physiological) (1)                                                                                     | -         |
| C1 - esterase inhibitor                      |      |     |                        | Unknown (pH and osmolality ~physiological) (10)                                                                             | -         |
| Ceftazidime                                  |      |     |                        | Unknown (pH and osmolality ~physiological) (2)                                                                              | -         |
| Ceftriaxone                                  |      |     |                        | No severe reactions (pain) (pH and osmolality ~physiological) (2)                                                           | -         |
| Ciclosporin                                  |      |     |                        | Unknown (pH ~physiological) (11)                                                                                            | -         |
| Crosslinking factor VIIa                     |      |     |                        | Unknown (pH ~physiological) *                                                                                               | -         |
| Colistin                                     |      |     |                        | Unknown (pH and osmolality ~physiological) (1)(11)                                                                          | -         |
| Danaparoid                                   |      |     |                        | Unknown (pH and osmolality ~physiological) (1)(11)                                                                          | -         |
| Darbepoetin                                  |      |     |                        | Unknown (pH ~physiological) (10)                                                                                            | -         |
| Dexamethasone                                |      |     |                        | Unknown (pH ~physiological) (1)                                                                                             | -         |
| Fentanyl                                     |      | low |                        | No severe reactions (pH ~physiological (6) and low osmolality (14 mOsm/kg)) (2)                                             | -         |
| Flecainide                                   |      |     |                        | Unknown (pH ~physiological) (11)                                                                                            | -         |
| Fluconazole                                  |      |     |                        | Unknown (pH and osmolality ~physiological) (1)(11)                                                                          | -         |
| Folic acid                                   |      |     |                        | Unknown (pH and osmolality ~physiological) (1)                                                                              | -         |
| Furosemide                                   |      |     |                        | No severe tissue reactions are known (pain) (high pH (8.0-9.3) and osmolality ~physiological) *(2)(10)(11)                  | -         |
| Hyaluronic acid                              |      |     |                        | Unknown (pH and osmolality ~physiological) *(1)                                                                             | -         |
| Hydrocortisone                               |      |     |                        | Unknown (pH and osmolality ~physiological) (1)                                                                              | -         |
| Imipenem/Cilastatin                          |      |     |                        | No severe reactions (pH and osmolality ~physiological) (2)(10)(11)                                                          | -         |
| Immunoglobulin human                         |      |     |                        | No severe reactions (pain and swelling) (pH range: 4.0-7.0 and osmolality ~physiological) (1)(2)                            | -         |
| Infliximab                                   |      |     |                        | Unknown (pH and osmolality ~physiological) (1)(6)                                                                           | -         |
| Influenza vaccin                             |      |     |                        | Unknown                                                                                                                     | -         |
| Insulin                                      |      |     |                        | Unknown (pH ~physiological) (6)                                                                                             | -         |
| Mepolizumab                                  |      |     |                        | Unknown (pH ~physiological) (1)                                                                                             | -         |
| Mercapto-ethansulfonacid                     |      |     |                        | Unknown (pH ~physiological) (1)                                                                                             | -         |
| Meropenem                                    |      |     |                        | No severe reactions (pH and osmolality ~physiological) (2)(6)(11)                                                           | -         |
| Methylprednisolone (acetate on Na-succinate) |      |     |                        | No severe reactions (pH and osmolality ~physiological) (2)                                                                  | -         |
| Natalizumab                                  |      |     |                        | Unknown (pH ~physiological) (11)                                                                                            | -         |
| Pamidronic acid                              |      |     |                        | Unknown (pH ~physiological) (1)(11)                                                                                         | -         |
| Pneumococcal vaccin                          |      |     |                        | Unknown                                                                                                                     | -         |
| Proflamine                                   |      |     |                        | Unknown (pH and osmolality ~physiological) (1)(6)                                                                           | -         |
| Ranitidine                                   |      |     |                        | Unknown (pH and osmolality ~physiological) (6)(11)                                                                          | -         |
| Rasburicase                                  |      |     |                        | Unknown (pH and osmolality ~physiological) (6)                                                                              | -         |
| Rituximab                                    |      |     |                        | Unknown (pH ~physiological) (11)                                                                                            | -         |
| Streptokinase                                |      |     |                        | Unknown (pH ~physiological) (6)(11)(13)                                                                                     | -         |
| Sugammadex                                   |      |     |                        | Unknown (pH and osmolality ~physiological) *                                                                                | -         |
| Teicoplanin                                  |      |     |                        | Unknown (pH ~physiological) (1)(11)                                                                                         | -         |
| Tenecteplase                                 |      |     |                        | Unknown (pH ~physiological) (11)                                                                                            | -         |
| Tobramycin                                   |      |     |                        | No severe damage to tissues (pH and osmolality ~physiological) (2)                                                          | -         |
| Tramadol                                     |      |     |                        | Unknown (pH and osmolality ~physiological) (6)(11)                                                                          | -         |
| Tranexamic acid                              |      |     |                        | Unknown (pH ~physiological) *(1)(13)                                                                                        | -         |
| Urokinase                                    |      |     |                        | Unknown (pH and osmolality ~physiological) (6)(11)                                                                          | -         |
| Voriconazole                                 |      |     |                        | Unknown (pH and osmolality ~physiological) (6)(11)                                                                          | -         |

| <b>UNKOWN</b>                         | <b>An agent of which it is unknown what kind of injury might occur when escaping the intended vascular pathway.</b> |
|---------------------------------------|---------------------------------------------------------------------------------------------------------------------|
| Acetylcysteine                        | Levosimendan                                                                                                        |
| Acetylsalicylic acid                  | Levothyroxine                                                                                                       |
| Adenosine                             | Medroxyprogesterone                                                                                                 |
| Alanyl glutamine                      | Metamizole                                                                                                          |
| Albumin (4% and 20%)                  | Methylethylmethylmethane                                                                                            |
| Alfentanil                            | Metoclopramide                                                                                                      |
| Alprostadil                           | Metoprolol                                                                                                          |
| Anidulafungin                         | Milrinone                                                                                                           |
| Argatroban                            | Nadroparin                                                                                                          |
| Ascorbic acid                         | Nandrolone                                                                                                          |
| Atosiban                              | Neostigmine                                                                                                         |
| Betamethasone acetaat/difosfaat       | Nicardipine                                                                                                         |
| Biperiden                             | Obidoxime                                                                                                           |
| Bivalirudin                           | Oxytocin                                                                                                            |
| Botulinu, A Toxine (Botox en Dysport) | Paracetamol                                                                                                         |
| Brivaracetam                          | Pegfilgrastim                                                                                                       |
| Calcitonin                            | Phenol (in water)                                                                                                   |
| Carbetocin                            | Phentolamine                                                                                                        |
| Cefazolin                             | Physostigmine                                                                                                       |
| Cefuroxime                            | Phytomenadione                                                                                                      |
| Clemastine                            | Piritramide                                                                                                         |
| Clonidine                             | Posaconazole                                                                                                        |
| Clorazepate                           | Prilocaine                                                                                                          |
| Coagulation factor VIII               | Procainamide                                                                                                        |
| Daptomycin                            | Protirelin                                                                                                          |
| Deferoxamine                          | Protrombin complex                                                                                                  |
| Dexmedetomidine                       | Pyridoxine                                                                                                          |
| Diclofenac                            | Remifentanil                                                                                                        |
| Droperidol                            | Rocuronium                                                                                                          |
| Ephedrine                             | Somatorelin                                                                                                         |
| Esketamine                            | Somatropin                                                                                                          |
| Esomeprazole                          | Sufentanil                                                                                                          |
| Fibrinogen                            | Sumatriptan                                                                                                         |
| Filgrastim                            | Suxamethonium                                                                                                       |
| Flucloxacillin                        | Theophylline                                                                                                        |
| Flumazenil                            | Thiamine                                                                                                            |
| Fosfomycin                            | Tigecycline                                                                                                         |
| Gadobenic acid (Dotarem)              | Tirofiban                                                                                                           |
| Gadoteridol (Prohance)                | Tolazoline                                                                                                          |
| Gadoxetic acid (Primovist)            | Triptorelin                                                                                                         |
| Glucagon                              | Ustekinumab                                                                                                         |
| Gonadorelin                           | Vedolizumab                                                                                                         |
| Gonadotrofin                          | Verapamil                                                                                                           |
| Granisetron                           | Zidovudine                                                                                                          |
| Haloperidol                           | Zoledronic acid                                                                                                     |
| Hydroxocobalamin(-2)                  |                                                                                                                     |
| Hydroxyethylstarch                    |                                                                                                                     |
| Ibutilide                             |                                                                                                                     |
| Isoniazid                             |                                                                                                                     |
| Jomeprol (Iomeron 300 en 350)         |                                                                                                                     |
| Joversol (Optiray 300 en 350)         |                                                                                                                     |
| Lacosamide                            |                                                                                                                     |
| Levetiracetam                         |                                                                                                                     |
| Levocarnitine                         |                                                                                                                     |
| Levofloxacin                          |                                                                                                                     |
| Levomepromazine                       |                                                                                                                     |

**REFERENCES CRASHCARD**

|    |                                                                                                                                                                                                                                                                                                                                                                                                                                                                                                                                                                                                                                                                                                                                                                                                                                                                                                                            |
|----|----------------------------------------------------------------------------------------------------------------------------------------------------------------------------------------------------------------------------------------------------------------------------------------------------------------------------------------------------------------------------------------------------------------------------------------------------------------------------------------------------------------------------------------------------------------------------------------------------------------------------------------------------------------------------------------------------------------------------------------------------------------------------------------------------------------------------------------------------------------------------------------------------------------------------|
| *  | Summary of Product Characteristics                                                                                                                                                                                                                                                                                                                                                                                                                                                                                                                                                                                                                                                                                                                                                                                                                                                                                         |
| ** | Summary of Product Characteristics Roche Canada                                                                                                                                                                                                                                                                                                                                                                                                                                                                                                                                                                                                                                                                                                                                                                                                                                                                            |
| 1  | IBM Micromedex, Truven Health<br>( <a href="https://www.micromedexsolutions.com/micromedex2/librarian/CS/44C345/ND_PR/evidenceexpert/ND_P/evidenceexpert/DUPLICATIONSHIELDSYNC/A7769D/ND_PG/evidenceexpert/ND_B/evidenceexpert/ND_AppProduct/evidenceexpert/ND_T/evidenceexpert/PFActionId/evidenceexpert.IntermediateToDocumentLink?docId=1008&amp;contentSetId=50&amp;title=Noncytotoxic+Drug+Extravasation+Therapy&amp;servicesTitle=Noncytotoxic+Drug+Extravasation+Therapy">https://www.micromedexsolutions.com/micromedex2/librarian/CS/44C345/ND_PR/evidenceexpert/ND_P/evidenceexpert/DUPLICATIONSHIELDSYNC/A7769D/ND_PG/evidenceexpert/ND_B/evidenceexpert/ND_AppProduct/evidenceexpert/ND_T/evidenceexpert/PFActionId/evidenceexpert.IntermediateToDocumentLink?docId=1008&amp;contentSetId=50&amp;title=Noncytotoxic+Drug+Extravasation+Therapy&amp;servicesTitle=Noncytotoxic+Drug+Extravasation+Therapy</a> ) |
| 2  | Clark E, Giambra BK, Hingl J, Doellman D, Tofani B, Johnson N. Reducing risk of harm from extravasation: A 3-tiered evidence-based list of pediatric peripheral intravenous infusates. <i>J Infus Nurs.</i> 2013;36(1):37-45.                                                                                                                                                                                                                                                                                                                                                                                                                                                                                                                                                                                                                                                                                              |
| 3  | Tse RKK. Letter to the editor: Extravasation of acetazolamide. 1998;1.                                                                                                                                                                                                                                                                                                                                                                                                                                                                                                                                                                                                                                                                                                                                                                                                                                                     |
| 4  | <a href="https://www.uptodate.com/contents/search">https://www.uptodate.com/contents/search</a>                                                                                                                                                                                                                                                                                                                                                                                                                                                                                                                                                                                                                                                                                                                                                                                                                            |
| 5  | Reynolds PM, Robert M, Mueller SW, Fish DN, Kiser TH. Management of extravasation injuries: A focused evaluation of noncytotoxic medications. <i>Pharmacotherapy.</i> 2014;34(6):617-632.                                                                                                                                                                                                                                                                                                                                                                                                                                                                                                                                                                                                                                                                                                                                  |
| 6  | University College London. Hospitals injectable medicines administration guide. third ed. Blackwell Reference Online: Blackwell Publishing; 2010.<br><a href="http://www.blackwellreference.com/public/book.html?id=g9781405148962_9781405148962.10.1111/b.9781405148962.2010.x">www.blackwellreference.com/public/book.html?id=g9781405148962_9781405148962.10.1111/b.9781405148962.2010.x</a> .                                                                                                                                                                                                                                                                                                                                                                                                                                                                                                                          |
| 7  | Gorski LA, Stranz M, Cook LS, et al. Development of an evidence-based list of noncytotoxic vesicant medications and solutions. <i>J Infus Nurs.</i> 2017;40(1):26-40.                                                                                                                                                                                                                                                                                                                                                                                                                                                                                                                                                                                                                                                                                                                                                      |
| 8  | Becker M, L., Paes E, C., van der Sijs, Heleen., I., van Nieuwenhoven Christianne. A. De behandeling van extravasaties van geneesmiddelen. <i>Nederlands Tijdschrift voor Geneeskunde.</i> 2011;155(A2839).                                                                                                                                                                                                                                                                                                                                                                                                                                                                                                                                                                                                                                                                                                                |
| 9  | N. Bouznad, G. El Mghari, N. El Ansari, F. Belarbi, O. Hocar, N. Akhdari and S. Amal. Skin Necrosis Caused by the Extravasation of Antibiotics: About A Case Report. <i>International Journal of Medical &amp; Clinical Imaging. IJMCI,</i> 1(2): 12-14.                                                                                                                                                                                                                                                                                                                                                                                                                                                                                                                                                                                                                                                                   |
| 10 | Lake C, Beecroft CL. Extravasation injuries and accidental intra-arterial injection. <i>Continuing Education in Anaesthesia, Critical Care &amp; Pain.</i> Volume 10 Number 4 2010                                                                                                                                                                                                                                                                                                                                                                                                                                                                                                                                                                                                                                                                                                                                         |
| 11 | A. Gray, J. Wright, V. Goodey and L. Bruce. <i>Injectable Drugs Guide.</i> Published by Pharmaceutical Press 2011. <a href="https://rudiapt.files.wordpress.com/2017/11/injectable-drugs-guide.pdf">https://rudiapt.files.wordpress.com/2017/11/injectable-drugs-guide.pdf</a>                                                                                                                                                                                                                                                                                                                                                                                                                                                                                                                                                                                                                                             |
| 12 | <a href="https://nvza-connect.nl">https://nvza-connect.nl</a> - Crashkaart NVZA                                                                                                                                                                                                                                                                                                                                                                                                                                                                                                                                                                                                                                                                                                                                                                                                                                            |
| 13 | <a href="http://www.gicu.sgul.ac.uk/teaching/resources/pharmacology-and-toxicology/files/itu_IV_guide_-_2008_update_v2.pdf">http://www.gicu.sgul.ac.uk/teaching/resources/pharmacology-and-toxicology/files/itu_IV_guide_-_2008_update_v2.pdf</a>                                                                                                                                                                                                                                                                                                                                                                                                                                                                                                                                                                                                                                                                          |
| 14 | Doellman D, Hadaway L, Bowe-Geddes LA, et al. Infiltration and extravasation: Update on prevention and management. <i>Journal of Infusion Nursing.</i> 2009;32(4):203-211.                                                                                                                                                                                                                                                                                                                                                                                                                                                                                                                                                                                                                                                                                                                                                 |
| 15 | Paula IC Shireman, M_D, Walter J. McCarthy, MD, James S. T. Yao, MD, PhD, and Robert L. Vogelzang, MD. Treatment of venous malformations by direct injection with ethanol. <i>JOURNAL OF VASCULAR SURGERY.</i> Volume 26, Number 5.                                                                                                                                                                                                                                                                                                                                                                                                                                                                                                                                                                                                                                                                                        |
| 16 | Yoshimura S1, Hashimoto N, Goto Y, Sampei K, Tsukahara T, Iihara K. Intraarterial infusion of high-concentration papaverine damages cerebral arteries in rats. <i>AJNR Am J Neuroradiol.</i> 1996 Nov-Dec;17(10):1891-4.                                                                                                                                                                                                                                                                                                                                                                                                                                                                                                                                                                                                                                                                                                   |
| 17 | <a href="https://kennisbank.knmp.nl/">https://kennisbank.knmp.nl/</a>                                                                                                                                                                                                                                                                                                                                                                                                                                                                                                                                                                                                                                                                                                                                                                                                                                                      |
